# Supplementary material for: S/HIC: Robust Identification of Soft and Hard Sweeps Using Machine Learning
Source: PLoS Genet. 2016 Mar 15;12(3):e1005928. doi: 10.1371/journal.pgen.1005928 (PMC4792382; doi:10.1371/journal.pgen.1005928)
Supplement: S2 Table — (XLSX) [file pgen.1005928.s015.xlsx]

## Sheet: Sheet1
Table S2: Feature importance rankings for S/HIC classifiers trained on three different demographic histories.
Feature rank	Equilibrium demography classifier feature*	Equilibrium demography classifier feature value**	African classifier feature***	African classifier feature value	Euro classifier feature***	Euro classifier feature value
1	ss_win5	0.0622844	pi_win5	0.0486081	ss_win5	0.0306411
2	pi_win5	0.0607092	ss_win5	0.041891	pi_win5	0.0291607
3	H12_win5	0.0206364	H12_win5	0.0202469	thetaH_win5	0.0232143
4	H2/H1_win5	0.0196429	H2/H1_win5	0.016592	H2/H1_win5	0.0173766
5	thetaH_win5	0.0195074	thetaH_win5	0.0128216	ss_win2	0.0111612
6	pi_win9	0.0158486	pi_win4	0.0116189	pi_win2	0.0107622
7	pi_win0	0.0152028	pi_win10	0.011561	pi_win6	0.0107574
8	pi_win1	0.0149434	fayWuH_win5	0.0115315	thetaH_win2	0.0107568
9	pi_win10	0.0148788	HapCount_win5	0.0112339	pi_win1	0.0107338
10	pi_win6	0.0145248	pi_win0	0.0110514	H2/H1_win6	0.0106263
11	pi_win4	0.0138108	pi_win6	0.0110008	pi_win9	0.0105594
12	pi_win8	0.0137906	pi_win9	0.010986	H12_win5	0.0104764
13	ss_win0	0.013701	pi_win1	0.0109255	thetaH_win6	0.010435
14	ss_win10	0.0136702	pi_win2	0.010823	ss_win1	0.0104164
15	pi_win2	0.0132887	pi_win8	0.0108071	pi_win4	0.0104147
16	ss_win1	0.013178	ss_win10	0.0103772	ss_win10	0.0103742
17	ss_win9	0.0129274	pi_win7	0.0103328	thetaH_win8	0.0103712
18	pi_win7	0.0125056	tajD_win5	0.0102566	thetaH_win0	0.0103508
19	ss_win4	0.0120868	H2/H1_win10	0.010117	thetaH_win10	0.0103455
20	ss_win6	0.0120186	ss_win1	0.0101092	ss_win0	0.0103088
21	ss_win2	0.0119131	ss_win9	0.0100934	ss_win4	0.010291
22	pi_win3	0.0117055	ss_win4	0.0100632	thetaH_win4	0.0102795
23	ss_win8	0.011621	H2/H1_win6	0.0100538	thetaH_win7	0.0102507
24	ss_win7	0.0107666	H2/H1_win4	0.00994933	thetaH_win1	0.0102404
25	H12_win0	0.010399	H2/H1_win9	0.0098875	H2/H1_win0	0.0102115
26	ss_win3	0.0103404	pi_win3	0.00978916	ss_win6	0.0101948
27	H2/H1_win4	0.0102865	ss_win8	0.00977806	H2/H1_win2	0.0101617
28	H2/H1_win6	0.0101681	ss_win6	0.00969618	H2/H1_win1	0.0101522
29	H12_win1	0.00975831	ss_win0	0.00965107	thetaH_win9	0.0101435
30	H2/H1_win1	0.00971209	H2/H1_win1	0.009624	ss_win9	0.0100694
31	H12_win9	0.009675	ss_win2	0.00955876	pi_win0	0.0100639
32	H2/H1_win9	0.00958489	H12_win2	0.00955143	pi_win7	0.0100595
33	H2/H1_win10	0.0094669	H12_win1	0.00952607	pi_win8	0.0100299
34	H12_win10	0.00924139	ss_win7	0.00951897	pi_win10	0.00994934
35	H2/H1_win0	0.00917561	H2/H1_win0	0.00950544	H2/H1_win4	0.00993196
36	H2/H1_win8	0.00915822	H12_win0	0.00943016	H2/H1_win7	0.00989829
37	H2/H1_win7	0.00907106	H1_win5	0.00940388	H2/H1_win9	0.00989371
38	H12_win7	0.00902706	H12_win10	0.00931069	pi_win3	0.00985416
39	H2/H1_win2	0.00899091	H2/H1_win2	0.00923592	thetaH_win3	0.00984098
40	H12_win8	0.00892567	H12_win9	0.0092111	H2/H1_win8	0.00982274
41	H12_win6	0.00892455	ss_win3	0.00910587	ss_win8	0.00977368
42	H12_win2	0.00891183	H12_win3	0.00905398	H2/H1_win10	0.009713
43	thetaH_win6	0.00882615	HapCount_win1	0.00905007	H2/H1_win3	0.00969404
44	H12_win4	0.0087711	H2/H1_win8	0.0090327	ss_win7	0.00966757
45	H2/H1_win3	0.00876456	fayWuH_win1	0.00902078	H12_win6	0.00959828
46	H12_win3	0.00861317	H12_win7	0.0089788	ss_win3	0.00957529
47	thetaH_win4	0.00856426	H1_win4	0.00897474	H12_win10	0.00936093
48	thetaH_win1	0.00820449	H2/H1_win7	0.00895374	H12_win8	0.00927692
49	thetaH_win7	0.00814828	H12_win8	0.0089196	H12_win7	0.00927361
50	thetaH_win3	0.00810777	H2/H1_win3	0.00890376	tajD_win5	0.00922031
51	thetaH_win9	0.00802473	H12_win6	0.00887612	HapCount_win7	0.00921902
52	thetaH_win10	0.00797309	H12_win4	0.00885781	H12_win4	0.00916318
53	thetaH_win0	0.00790893	fayWuH_win4	0.00882943	H12_win1	0.00915021
54	thetaH_win8	0.00768557	HapCount_win4	0.00878041	H12_win3	0.00914719
55	thetaH_win2	0.00764588	fayWuH_win0	0.00878023	H12_win9	0.00911071
56	HapCount_win5	0.00704617	fayWuH_win9	0.00874887	H12_win0	0.0090871
57	H1_win5	0.0070252	H1_win1	0.00874825	H1_win7	0.00908282
58	fayWuH_win5	0.00691756	H1_win6	0.00872474	HapCount_win10	0.00905728
59	tajD_win5	0.00675784	H1_win0	0.00866592	HapCount_win9	0.00905429
60	H1_win4	0.00664677	HapCount_win10	0.00857959	tajD_win2	0.00905026
61	tajD_win3	0.00663893	fayWuH_win8	0.00855867	HapCount_win5	0.0090245
62	tajD_win4	0.00663776	tajD_win4	0.00855625	fayWuH_win7	0.00900495
63	H1_win8	0.00661577	HapCount_win6	0.00853847	tajD_win10	0.00898951
64	HapCount_win1	0.00659431	tajD_win8	0.008538	fayWuH_win5	0.00898615
65	tajD_win1	0.00657932	fayWuH_win10	0.00852276	HapCount_win1	0.00896271
66	HapCount_win0	0.0065787	thetaH_win4	0.00851545	tajD_win6	0.00895226
67	tajD_win7	0.00657822	HapCount_win0	0.00850853	HapCount_win2	0.00891649
68	H1_win10	0.00657672	tajD_win1	0.00849197	H1_win5	0.0089027
69	fayWuH_win8	0.00657616	thetaH_win9	0.00848681	H1_win1	0.00888556
70	HapCount_win10	0.00654871	tajD_win0	0.00847905	tajD_win7	0.00886845
71	fayWuH_win0	0.00654785	H1_win10	0.00847655	HapCount_win6	0.00886784
72	tajD_win10	0.00654396	HapCount_win9	0.00846989	tajD_win8	0.00886559
73	tajD_win8	0.00654036	thetaH_win10	0.0084556	tajD_win4	0.00886206
74	H1_win6	0.00653433	fayWuH_win2	0.0084266	H1_win8	0.00885628
75	H1_win3	0.00653188	H1_win7	0.00842546	HapCount_win8	0.00884488
76	HapCount_win3	0.00652283	H1_win9	0.00841629	fayWuH_win1	0.00883613
77	fayWuH_win1	0.00651343	thetaH_win6	0.00841434	H12_win2	0.00882616
78	H1_win9	0.00651168	thetaH_win2	0.00840955	H1_win10	0.00882434
79	tajD_win6	0.00648089	HapCount_win7	0.00840399	tajD_win1	0.00881335
80	H1_win1	0.00647894	thetaH_win7	0.00839415	tajD_win9	0.00881176
81	tajD_win9	0.00647276	fayWuH_win6	0.00837581	H1_win6	0.00880693
82	H1_win2	0.00646859	tajD_win6	0.00837042	tajD_win0	0.00879339
83	HapCount_win9	0.00646593	thetaH_win3	0.00836902	fayWuH_win10	0.00878676
84	HapCount_win4	0.00644946	thetaH_win8	0.00836688	fayWuH_win2	0.00876524
85	tajD_win2	0.006448	HapCount_win8	0.00834851	HapCount_win0	0.00876389
86	H1_win7	0.00643453	thetaH_win1	0.00834766	fayWuH_win4	0.00874929
87	fayWuH_win2	0.00643351	thetaH_win0	0.00832376	fayWuH_win6	0.00874748
88	HapCount_win2	0.00641953	H1_win3	0.0083161	H1_win0	0.008747
89	fayWuH_win3	0.00641026	fayWuH_win3	0.00831003	fayWuH_win8	0.00873554
90	fayWuH_win10	0.00640763	tajD_win7	0.0083044	fayWuH_win3	0.00872403
91	HapCount_win8	0.00639672	H1_win2	0.00829885	HapCount_win3	0.00872115
92	H1_win0	0.00636999	tajD_win9	0.0082554	fayWuH_win9	0.00872077
93	fayWuH_win9	0.00636455	HapCount_win2	0.00824591	tajD_win3	0.00868438
94	HapCount_win6	0.00634494	fayWuH_win7	0.00823379	H1_win9	0.00866165
95	tajD_win0	0.00630465	tajD_win10	0.00821159	H1_win3	0.00860754
96	fayWuH_win6	0.00628909	HapCount_win3	0.00817067	fayWuH_win0	0.00860541
97	fayWuH_win4	0.00627776	H1_win8	0.00815311	HapCount_win4	0.00860516
98	HapCount_win7	0.00627301	tajD_win3	0.00810902	H1_win4	0.00852198
99	fayWuH_win7	0.00622689	tajD_win2	0.00808573	H1_win2	0.00849291
*for this classifier's training data, soft sweeps' f0 parameters were drawn from U(0, 0.2)
**relative mean decrease in impurity (see Methods)
***demographic models from Tennessen et al. (2012)
