# Supplementary material for: S/HIC: Robust Identification of Soft and Hard Sweeps Using Machine Learning
Source: PLoS Genet. 2016 Mar 15;12(3):e1005928. doi: 10.1371/journal.pgen.1005928 (PMC4792382; doi:10.1371/journal.pgen.1005928)
Supplement: S3 Table — (XLSX) [file pgen.1005928.s016.xlsx]

## Sheet: Sheet1
Table S3: Extra-Trees classifier parameter grid search results for S/HIC classifiers trained on three different demographic histories.
Classifier	Perform boostrapping when generating trees?	Maximum number of features considered when forming tree branches	Split quality criterion	Min training examples per tree split	Max tree depth	Min training examples per tree leaf
Eqbuilibrium demographic model*	No	99	Gini Impurity	10	None	1
African demographic model**	No	99	Gini Impurity	3	None	1
European demographic model**	Yes	99	Gini Impurity	1	10	1
*for this classifier's training data, soft sweeps' f0 parameters were drawn from U(0, 0.2)
***demographic models from Tennessen et al. (2012)
